# Supplementary material for: Retrospective Analysis of Pediatric Hepatoblastoma With Tumor Rupture: Experience From a Single Center
Source: Front Pediatr. 2022 Mar 22;10:799307. doi: 10.3389/fped.2022.799307 (PMC8980550; doi:10.3389/fped.2022.799307)
Supplement: Supplementary file 1 [file Table_1.XLSX]

## Sheet: Sheet1
Patient	Gende/age	PRETEXT number	Vascularin volvement	Histology subtype	AFP at diagnosis (ng/mL)	Tumor site	Extra-hepatic metastasis	Tumor size (mm)	Primary tumor	metastatic disease	complete resection	Microscopic positive	Status at last follow-up (year)
1	M/0.2	Ⅳ	P2	Epi/Mix	>120000	All		70×60×98	PR		Y(OLT)	-	4.7
2	F/9	Ⅲ	P2a	Mix/Tera	>120000	RPS/RAS/LMS	M1(N)	90×55×72	PR	CR	Y	N	5.6
3	F/7.5	Ⅲ	P2	Epi/Em	>120000	RPS/RAS/LMS		100×74×110	PR		Y	N	3.6
4	F/3	Ⅲ	P2a	Epi/ Mix	>120000	RPS/RAS/LMS		88×50×95	PR		Y	N	4.9
5	M/0.5	Ⅲ	V3/P2	Epi/ Fet	>120000	RAS/LMS/LLS		84×60×95	PR		Y	N	3.2
6	M/1	Ⅲ	none	Epi/ Fet	>120000	RAS/LMS	M1(Lung)	74×80×37	PR	CR	Y	N	Relapsed and died(1)
7	F/2.5	Ⅲ	none	Epi/ Fet	>120000	RPS/RAS/LMS	M1(Lung)	100×69×77	PR	CR	Y	N	DOD(0.9)
8	F/3	Ⅲ	none	Epi/ Em	>120000	RPS/RAS/LMS	M1(Lung)	92×80×50	PR	CR	Y	N	DOD(1.8)
9	M/15	Ⅲ	none	Epi/ Fet	>120000	RPS/RAS/LMS	M1(Lung)	150×120×109	PR	CR	Y(OLT)	-	Relapsed and died(1)
10	M/0.7	Ⅲ	P2	Epi/ Fet	9008	RPS/RAS/LMS		93×85×48	PR		Y	N	4.5
11	M/1.5	Ⅲ	P2	Epi/ Em	>120000	RPS/RAS/LMS		88×72×64	PR		Y	N	3.4
12	F/2	Ⅲ	V3a	Epi/Em	>120000	RPS/RAS/LMS		89×52×69	PR		Y	Y	Relapsed,alive(0.6)
13	M/4	Ⅲ	V3a	Epi/ Mix	>120000	RPS/RAS/LMS		102×60×75	PR		Y	N	3.1
14	F/6	Ⅳ	V3a/P2	Epi/ Fet	>120000	All		112×58×62	PR	PR	Y(OLT)	-	Relapsed and died(0.5)
15	F/8	Ⅳ	V3a/P2	Epi/ Fet	>120000	All	M1(Lung)	106×97×86	PD		Y(OLT)	-	DOD(1.5)
16	M/5.6	Ⅲ	P2	Epi/ Fet	850001	RPS/RAS/LMS		88×65×78	PR		Y	N	2.9
17	M/1	Ⅲ	V3a	Epi/ Em	10302	RAS/LMS/LLS		74×72×64	PR		Y	N	3
18	F/4	Ⅲ	V3a	Epi/ Fet	40003	RPS/RAS/LMS		75×58×43	PR		Y	N	4.2
19	F/3	Ⅲ	V3/P2	Epi/Em	>120000	RPS/RAS/LMS		97×45×78	PR		Y	N	2.9
20	M/3	Ⅲ	P2	Epi/ Mix	>120000	RAS/LMS		120×65×62	PR		Y	N	DOD(1.1)
21	F/6	Ⅲ	V3/P2	Epi/ Fet	>120000	RPS/RAS/LMS		97×93×66	PR		Y	Y	6.8
22	M/0.6	Ⅲ	V3a	Epi/ Fet	>120000	RAS/LMS		65×32×78	PR		Y	N	DOD(0.7)
23	F/3	Ⅲ	P2a	Epi/ Fet	>120000	RAS/LMS		45×67×85	PR		Y	N	7.3
24	F/3	Ⅲ	P2	Epi/ Em	>120000	RAS/LMS		101×52×89	PR		Y	N	5.9
25	F/1.9	Ⅲ	none	SCU	normal	RPS/RAS/LMS	M1(Lung)	98×80×76	PR	SD	N	-	DOD(2)
Note F,femal; M, male; P2, involvement of the main portal vein; V3, involvement of all three hepatic veins and/or the interior vena cava; add suffix "a" if intravascular tumour is present; Epi, epithelial; Mix, mixed; Tera, teratoid; Em, embryonal; Fet, fetal; SCU, small cell undifferentiated; RPS, right posterior section; RAS, right anterior section; LMS, left medial section; LLS, left lateral s…
